# Supplementary material
Source: PubMed Central journal article supplement (PMC4547320)
Supplement: DS_10.1177_0022034515593744.pdf [file DS_10.1177_0022034515593744.pdf]

# Letter to the Editor, “Osterix Regulates Tooth Root Formation in a Site-specific Manner”

Journal of Dental Research  
DSI–DS3  
© International & American Associations  
for Dental Research 2015  
Reprints and permissions:  
sagepub.com/journalsPermissions.nav  
DOI: 10.1177/0022034515593744  
jdr.sagepub.com

J.Q. Feng<sup>1</sup>, H. Zhang<sup>1</sup>, and C. Qin<sup>1</sup>

## Appendix

---

<sup>1</sup>Department of Biomedical Sciences, Texas A&M Baylor College of Dentistry, Dallas, TX, USA

**Corresponding Author:**

J.Q. Feng, Biomedical Sciences, Baylor College of Dentistry, TX A&M,  
3302 Gaston Ave, Dallas, TX 75246, USA.  
Email: jfeng@bcd.tamhsc.edu

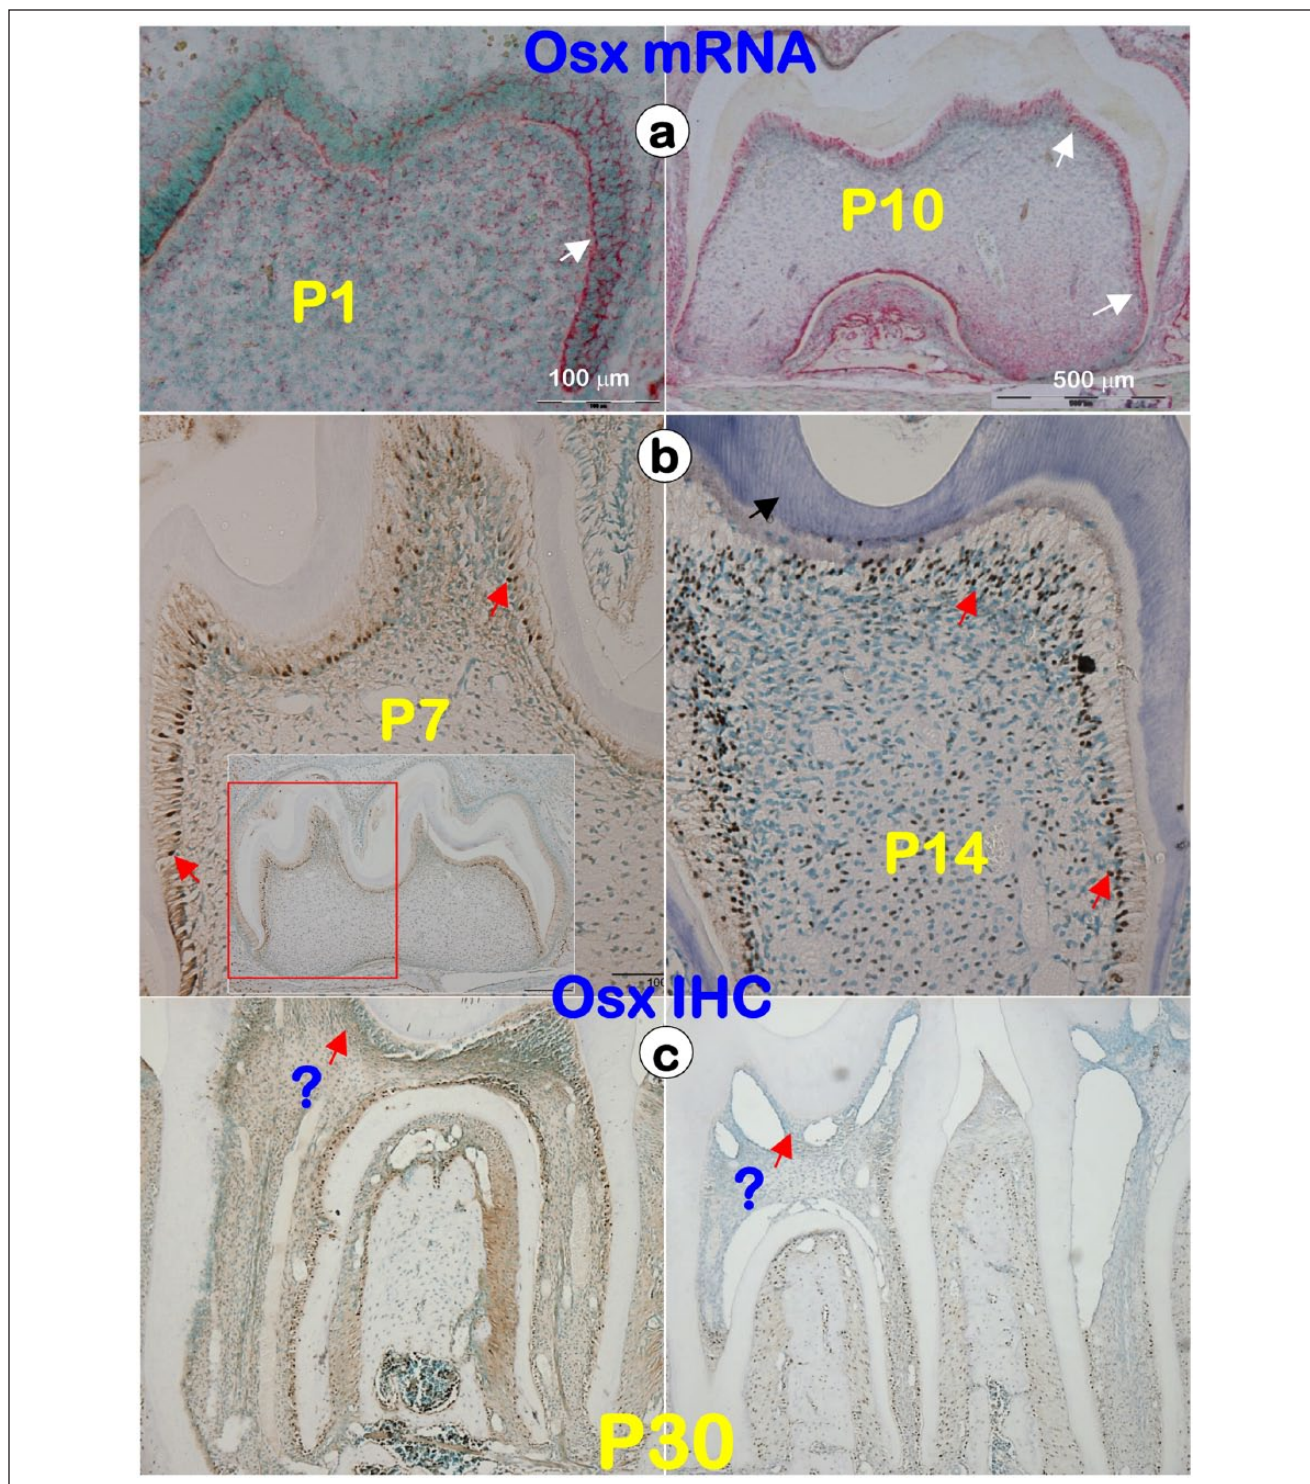

**Appendix Figure 1.** *Osx* expression patterns during postnatal (P) development (in days). (a) In situ hybridization revealed a strong *Osx* signal (red and white arrows) in odontoblasts in both crown and root at P1 (left panel) and P10 (right panel). (b) Immunohistochemistry stains showed no apparent difference of OSX signals in both crown and root odontoblasts in P7 (left, red arrows, low and high magnification) and P14 (right, red arrows). (c) There are few positive OSX signals in crown odontoblasts (red arrows) in comparison with those in roots in 2 animal molars at P30, when crown dentin is already formed. The data do not support the view of a site-specific expression of OSX in molar, as suggested by Kim et al. (2015). IHC, immunohistochemistry.

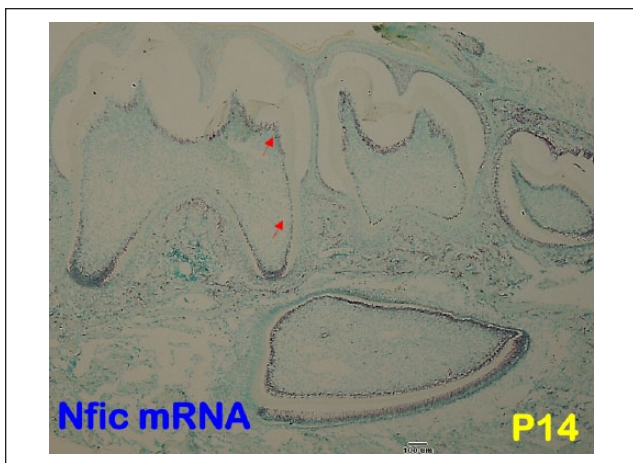

**Appendix Figure 2.** *Nfic* expression patterns in both incisor and 3 molars at postnatal day 14. In situ hybridization revealed an even expression pattern of *Nfic* in both incisor and molar in all odontoblasts (red arrows).

### Appendix Reference

Kim TH, Bae CH, Lee JC, Kim JE, Yang X, de Crombrughe B, Cho ES. 2015. Osterix regulates tooth root formation in a site-specific manner. *J Dent Res.* 94(3):430–438.
